# Supplementary material
Source: Royal Society of Chemistry journal article supplement (doi:10.1039/d6py00075d)

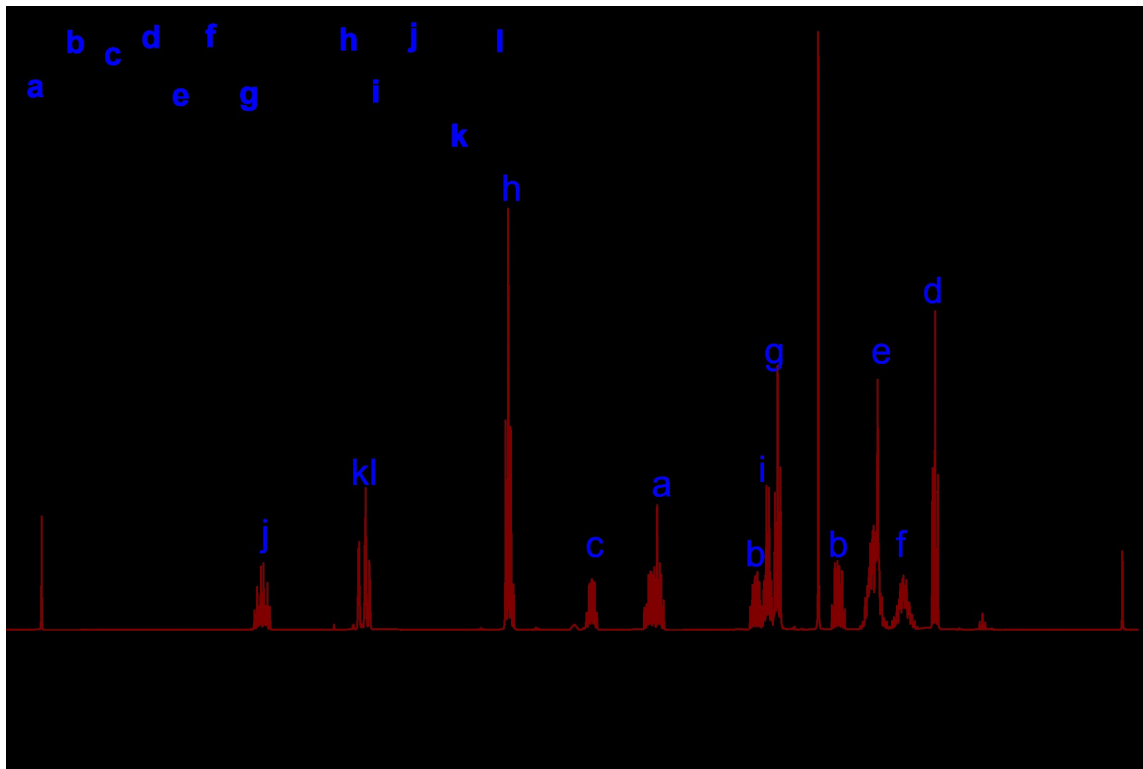

Supplement: d6py00075d1.pdf [file d6py00075d1.pdf]

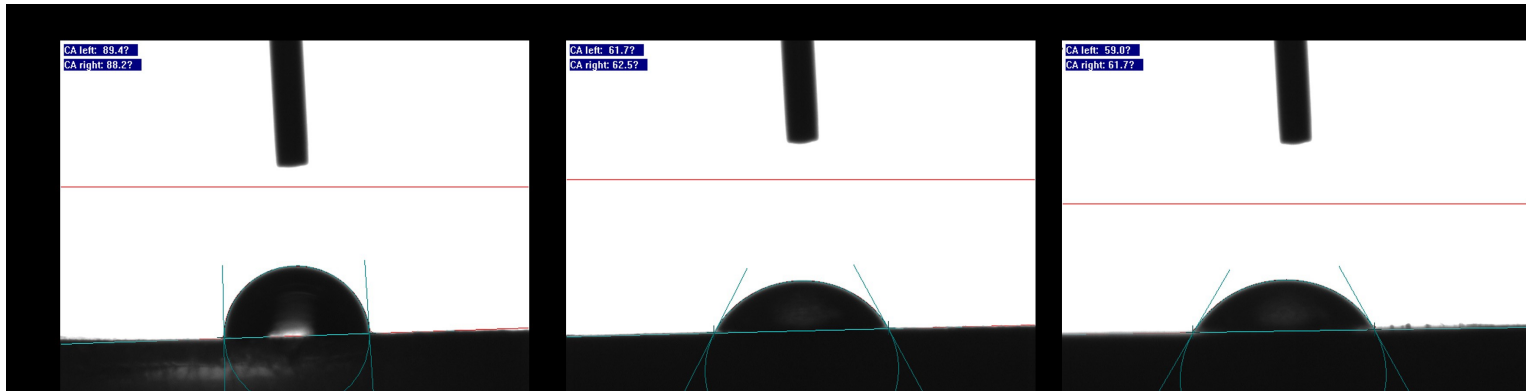

Supplement: d6py00075d4.pdf [file d6py00075d4.pdf]

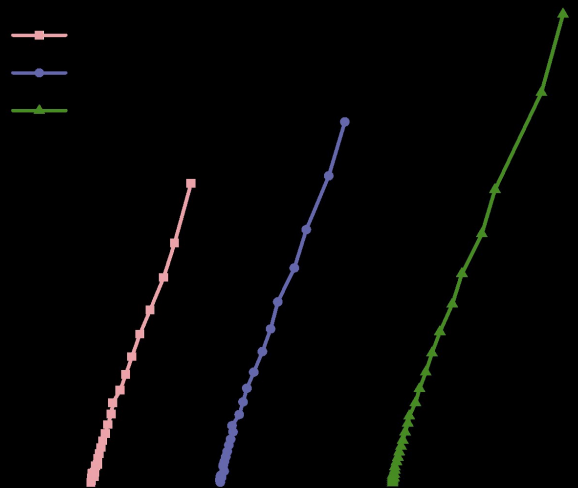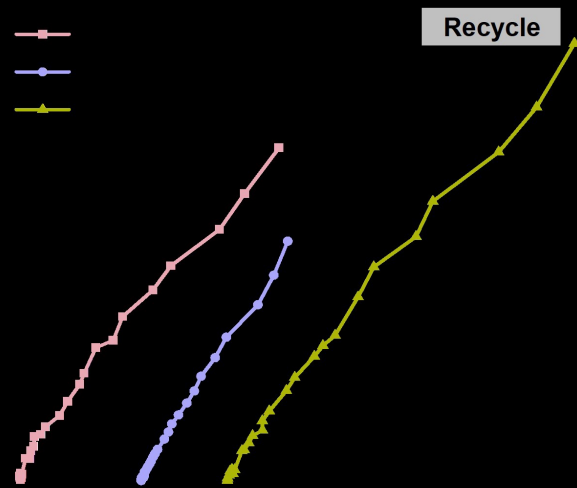

Supplement: d6py00075d6.pdf [file d6py00075d6.pdf]

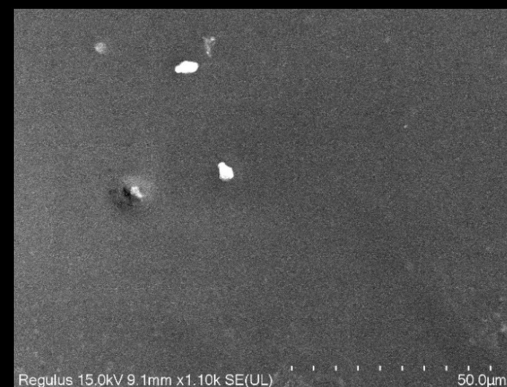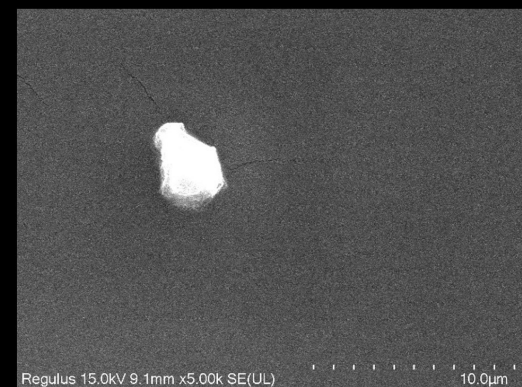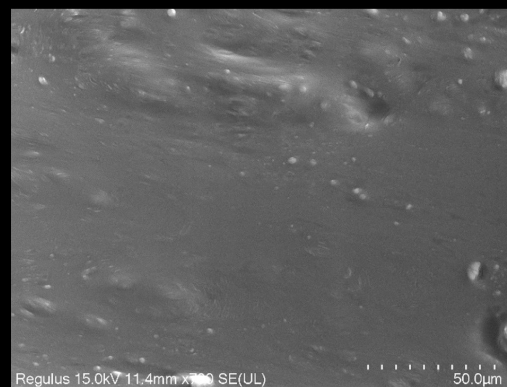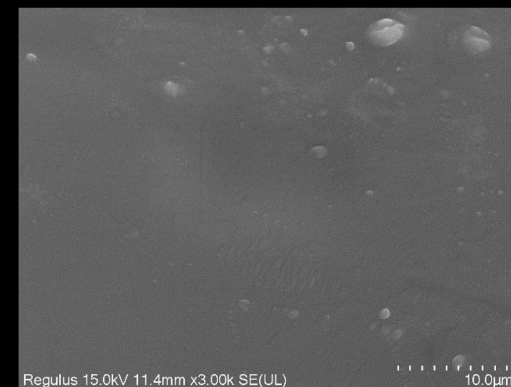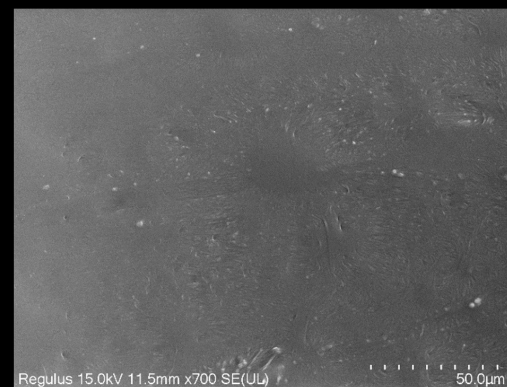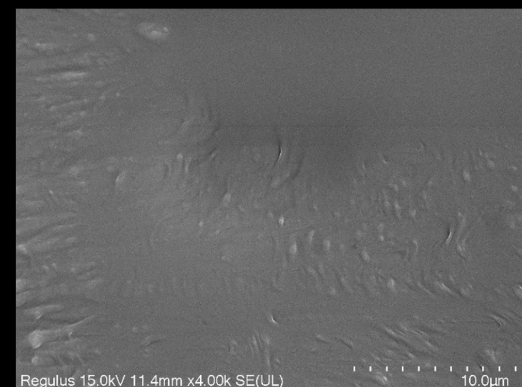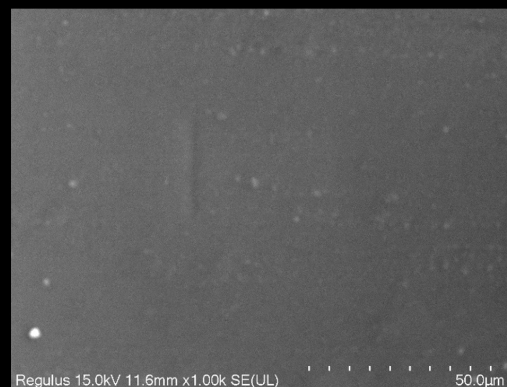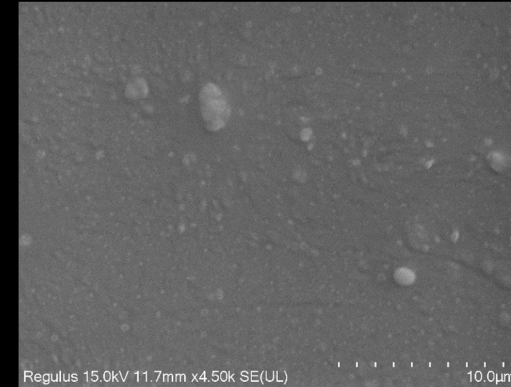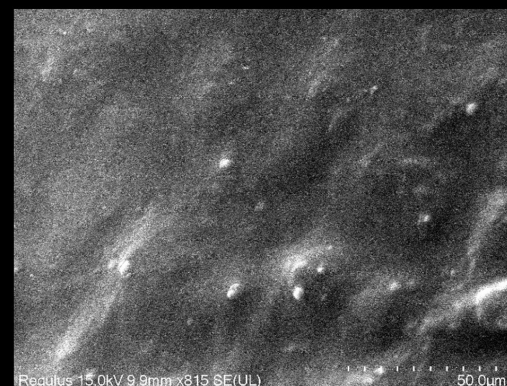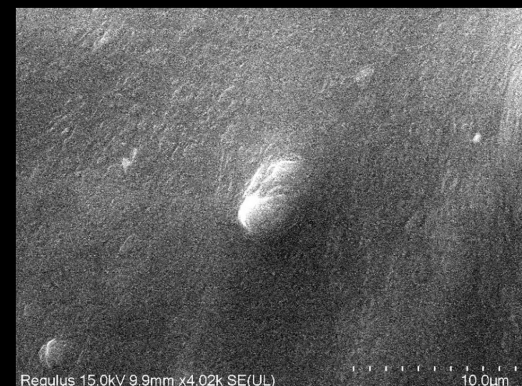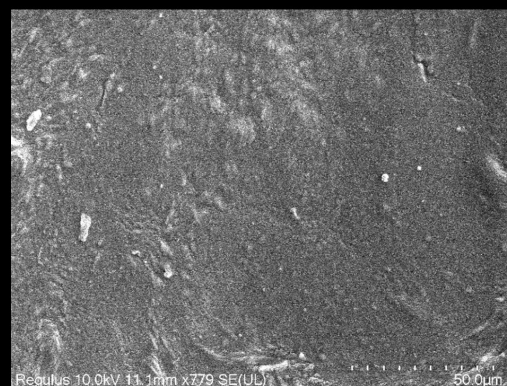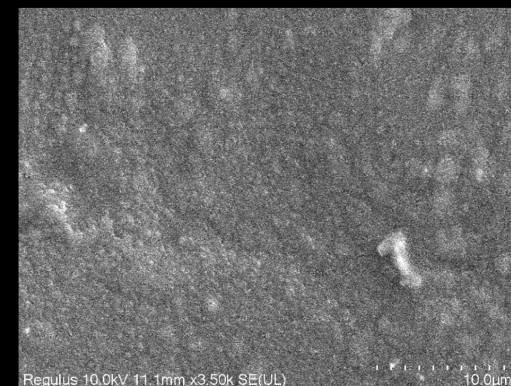

Supplement: d6py00075d7.pdf [file d6py00075d7.pdf]
